# Supplementary material
Source: MDPI journal article supplement (https://www.mdpi.com/2073-445X/11/10/1850)
Supplement: s1 [file s1]

**Table S1.** CSA practices undertaken by farmers in DRC as adaptation and mitigation strategies.

| <b>CSA practices</b>                                                                                                                              | <b>Adaptation/ mitigation</b>                                                                                                                                                                                                                                                 | <b>Implementation/ sponsor</b>                                                                                                                                                                                               | <b>Region</b>                                           | <b>References</b>          |
|---------------------------------------------------------------------------------------------------------------------------------------------------|-------------------------------------------------------------------------------------------------------------------------------------------------------------------------------------------------------------------------------------------------------------------------------|------------------------------------------------------------------------------------------------------------------------------------------------------------------------------------------------------------------------------|---------------------------------------------------------|----------------------------|
| Use of crop rotation, fallow practice, biofertilizers, and bio-pesticides                                                                         | Sustain soil fertility and productivity by using organic-based treatments. Use of sustainable agriculture as a response to reducing deforestation while at the same time lowering agriculture's carbon footprint and promoting a resilient and more productive farming system | The University of Kisangani implemented the study through the financial support of the European Union, the Centre for International Forestry Research (CIFOR), and the Norwegian Agency for Development Cooperation (NORAD). | Yangambi, northern DRC                                  | Mangaza et al. (2021)      |
| Use of different crop varieties, crop diversification, changing planting dates, strengthening nonfarm activities, and increased use of irrigation |                                                                                                                                                                                                                                                                               |                                                                                                                                                                                                                              | Bukavu, eastern DRC                                     | Bele et al. (2014)         |
| Fallow practice, mixed cropping based on maize and peanuts; cassava, peanuts, and maize; banana, maize, and peanuts; Cucurbita, coffee, or cocoa. | Preserve biodiversity and sustain soil fertility; enhancing sustainable crop production<br><br>Adjusting planting dates (new cropping calendar)                                                                                                                               | The University of Kisangani implemented the study<br><br>Université Evangelique en Afrique                                                                                                                                   | Kisangani, north-eastern DRC<br><br>Bukavu, eastern DRC | Sabongo (2007)             |
| Fallow practices                                                                                                                                  | Sustain soil fertility by improving soil microbial organisms                                                                                                                                                                                                                  | The University of Kisangani                                                                                                                                                                                                  | Yoko and Kindu in the north and central east of DRC     | Kumba, (2007); Yuma (2016) |

|                                                                                                                                                                             |                                                                                                                                                                                                                                                                                                                                                                                |                                                                                       |                      |               |
|-----------------------------------------------------------------------------------------------------------------------------------------------------------------------------|--------------------------------------------------------------------------------------------------------------------------------------------------------------------------------------------------------------------------------------------------------------------------------------------------------------------------------------------------------------------------------|---------------------------------------------------------------------------------------|----------------------|---------------|
| Agroforestry with legume trees ( <i>Acacia auriculiformis</i> and <i>Albizia chinensis</i> ); Succession planting, crop rotation, alley cropping, mulching, mixed cropping. | Hedgerow cropping systems legumes periodically pruned, and the modus is applied to the soil to improve physical properties (doubled productivity of cereals such as rice, maize, etc.); improve agroecosystem resilience, promoting reforestation while at the same time lowering agriculture's carbon footprint and promoting a resilient and more productive farming system. | University of Kisangani with the financial support of Lutheran World Federation (LWF) | Kubagu, North of DRC | Kavira (2016) |
|-----------------------------------------------------------------------------------------------------------------------------------------------------------------------------|--------------------------------------------------------------------------------------------------------------------------------------------------------------------------------------------------------------------------------------------------------------------------------------------------------------------------------------------------------------------------------|---------------------------------------------------------------------------------------|----------------------|---------------|

**Table S2.** CSA practices in eastern DRC by UEA staff members

| No | CSA Practices                             | Project name         | Resource persons                                        | Area                    | Funders                    | Beneficiaries                              | Documentation             |
|----|-------------------------------------------|----------------------|---------------------------------------------------------|-------------------------|----------------------------|--------------------------------------------|---------------------------|
| 1  | Soil and Water Conservation               | Thesis project       | Espoir Bagula                                           | Ruzizi Plain            | UEA, PPM, RUFORUM          | Ruzizi plain farmers                       | Articles available online |
| 2  | Biogas                                    | Projet Environnement | Katcho Karume, Francine Safina, Bintu Ndusha            | Bukavu                  | PMU                        | Bukavu population                          | Reports                   |
| 3  | Agroforestry                              |                      | Géant Chuma Basimine                                    | Itombwe Natural Reserve | PPM                        | Populations around Itombwe Natural Reserve | Articles available online |
| 4  | Crop-livestock integration                | Humid Tropics        | Espoir Bagula, Rodrigue Ayagirwe                        | South-Kivu, Mushinga    | IITA                       | Mushinga farmers                           | Articles available online |
| 5  | Weather forecasting and cropping calendar | SVS                  | Gustave Mushagalusa, Jean Mondo Mubalama, Katcho Karume | South-Kivu              | USAID                      | Bean, soybean, and coffee farmers          | Reports                   |
| 6  | ISFM                                      | -                    | Espoir Bagula                                           | South-Kivu              | CIALCA, N2 AFRICA, DIOBASS | South-Kivu farmers                         | Articles available online |

|    |                                    |                                                         |                                                                                      |                    |                    |                                             |                           |
|----|------------------------------------|---------------------------------------------------------|--------------------------------------------------------------------------------------|--------------------|--------------------|---------------------------------------------|---------------------------|
| 7  | Biofertilizer                      | Thesis project                                          | Bintu Ndusha                                                                         | South-Kivu         | N2 AFRICA, RUFORUM | Soybean farmers                             | Articles available online |
| 8  | Biopesticide                       | Thesis project                                          | Janvier Mugisho, Marcellin Cokola, Parent Kulimushi                                  | South & North-Kivu | UEA, PPM           | Banana and maize farmers                    | Articles available online |
| 9  | Agroecology farming systems        | Thesis project/Consortium for Agroecology in South-Kivu | Serge Ndjadi, Gustave Mushagalusa, Katcho Karume, Adrien Ndeko & Jean Mondo Mubalama | South-Kivu         | UEA, PPM           | South-Kivu farmers                          | Articles available online |
| 10 | Improved varieties                 | HarvestPlus                                             | Jean Mondo, Gustave Mushagalusa                                                      | South & North-Kivu | HarvestPlus        | South-Kivu farmers                          | Reports                   |
| 11 | Improved cultural practices        | Students Research Project                               | Gustave Mushagalusa                                                                  | South-Kivu         | PPM                | South-Kivu farmers                          | Articles available online |
| 12 | Value addition                     | URVC                                                    | Jean Mondo, Géant Chuma, Caroline Sibomana                                           | South-Kivu         | PPM, DIOBASS       | Bakeries, mushroom producers                | Articles available online |
| 13 | Watershed management               | PABS                                                    | Gustave Mushagalusa                                                                  | Mumoshho           | SINELAC            | Mumoshho dam and surrounding populations    | Reports                   |
| 14 | Environmental resources management | Projet Environnement                                    | Gustave Mushagalusa                                                                  | South-Kivu         | PMU                | Schools, Churches, farmers, all the society | Reports                   |
| 15 | Forestation                        | Projet Environnement                                    | Gustave Mushagalusa                                                                  | South-Kivu         | PMU                | Schools, Churches, farmers, all the society | Reports                   |
| 16 | Waste recycling                    | Projet Champignon                                       | Jean Mondo, Gustave Mushagalusa                                                      | South-Kivu         | PPM, DIOBASS       | South-Kivu farmers                          | Articles available online |
| 17 | Land restoration                   | FSP                                                     | Gustave Mushagalusa, Espoir Bagula, Katcho Karume                                    | South-Kivu         | Mercy Corp         | South-Kivu farmers                          | Reports                   |
| 18 | Crop diversification               | Neglected and Underutilized Crop Species                | Jean Mondo & René Civava                                                             | South-Kivu         | UEA, PPM           | Kabare and Walungu farmers                  | Articles available online |

**Table S3. Organizations involved in CSA in eastern DRC**

| N° | Institution | Types         | Status      | CSA theme               | CSA category            | Selected practices                                                                           | Action field | Main crops                              | Intervention Zone    | Funding body     | Ongoing CSA projects | Resource persons        |
|----|-------------|---------------|-------------|-------------------------|-------------------------|----------------------------------------------------------------------------------------------|--------------|-----------------------------------------|----------------------|------------------|----------------------|-------------------------|
| 1  | DIOBASS     | Local         | ASBL        | LRA, CR, ISFM           | Agroforestry , Agronomy | Intercropping, OM, mulching, green manure, Conservation Agriculture (CA)                     | Humanitarian | Bean and maize, cassava, trees, forages | North and South Kivu |                  | No                   | pdiobass@gmail.com      |
| 2  | INERA       | Local         | Public      | All                     |                         | Crop diversity, Composting, Cropping system, Crop rotation, IPM, ISFM, cover crop, mulching  | Research     | All                                     | Kabare               |                  | Yes                  | rene.civava@outlook.com |
| 3  | GIZ         | International | Cooperation | LRA                     | Agroforestry            | Land restoration, Forest management , parkland                                               |              | Trees                                   | All the province     | Dutch Government |                      | hwabamambo@gmail.com    |
| 4  | MERCY CORPS | International | Cooperation | LRA, ISFM, CR, WHM, MVM | Agroforestry , Agronomy | Intercropping, Permagarden, SWC, ISFM, Composting, cover crop, mulching, double digging, Zai | Humanitarian | Cassava, maize, bean and vegetables     | Kabare, Kelehe       | USAID            | Yes                  |                         |

|    |                  |               |                    |                         |                        |                                                                                              |                                    |                                     |                         |          |     |                                               |
|----|------------------|---------------|--------------------|-------------------------|------------------------|----------------------------------------------------------------------------------------------|------------------------------------|-------------------------------------|-------------------------|----------|-----|-----------------------------------------------|
| 5  | Harvest Plus     | International | Research institute | CR                      | Agronomy               | Intercropping, cropping system, improved and biofortified varieties                          | Research, Diffusion                | Bean and maize                      | Kabare, Kalehe, Walungu | CIAT     |     | a.k.lubobo@cgiar.org                          |
| 6  | World Vision     | International | Cooperation        | LRA, ISFM, CR, WHM, MVM | Agroforestry, Agronomy | Intercropping, Permagarden, SWC, ISFM, Composting, cover crop, mulching, double digging, Zaï | Humanitarian                       | Cassava, maize, bean and vegetables | Kalehe                  | USAID    | Yes |                                               |
| 7  | CARITAS          | International | Religious          | CD                      |                        |                                                                                              | Humanitarian                       | Vegetables                          | Idjwi, Kabare           |          | No  | louisciza@gmail.com                           |
| 8  | SARCAF           | Local         | ASBL               | CD, PHM, MVM            | Agronomy               | Crop diversity, Composting, Cropping system                                                  | Humanitarian                       | Soybean, Vegetables                 | Kabare, Walungu, Fizi   |          |     |                                               |
| 9  | FH               | International | Cooperation        | LRA, CD, ISFM           | Agroforestry, Agronomy |                                                                                              | Humanitarian                       | Trees, vegetables                   | Walungu                 |          |     |                                               |
| 10 | WOMAN for WOMAN  | International | Cooperation        | CD, ISFM                | Agronomy               |                                                                                              | Humanitarian                       |                                     | Walungu,                |          |     |                                               |
| 11 | FONDATI ON PANZI | Local         | ASBL               | CD                      | Agronomy               |                                                                                              | Humanitarian, gender, sex violence | Bean, maize, vegetables             | Kabare                  |          | Yes | tico812182@yahoo.fr                           |
| 12 | ADEPAE           | Local         | ASBL               | LRA, LAM                | Agroforestry, Agronomy |                                                                                              |                                    | All                                 | All the province        | CORDA ID |     | sunzu.adepae@yahoo.fr , adepaecoord@gmail.com |
| 13 | IPEL             | Local         | Public             | All                     | Agroforestry, Agronomy |                                                                                              | Monitoring                         |                                     | All the province        |          |     |                                               |

|    |             |               |                    |                   |                                    |                                                                      |                      |                      |                            |                        |     |                                   |
|----|-------------|---------------|--------------------|-------------------|------------------------------------|----------------------------------------------------------------------|----------------------|----------------------|----------------------------|------------------------|-----|-----------------------------------|
| 14 | IPA         | Local         | Public             | All               | Agroforestry ,Agronomy             |                                                                      | Monitoring           |                      | All the province           |                        |     |                                   |
| 15 | UEA         | Local         | Research institute | LRA, CD           | Agronomy, Agroforestry             | Land restoration, Seed production                                    | Research             | Trees, maize, bean   | Kabare (Mumoshu, Kashusha) | SINELAC                |     | rayagirwe@gmail.com               |
| 16 | ZOA         | International | Cooperation        | LRA, WHM, ISFM    | Agroforestry                       | Forestry, Irrigation, ISFM                                           | IRWM                 | Trees, Rice, Cassava | Ruzizi valley              | the Netherlands        |     | omatumaini@louvaincooperation.Org |
| 17 | CORDAID     | International | Cooperation        | LAM, MVM          | Agronomy                           | Livestock                                                            | Humanitarian         |                      |                            |                        |     |                                   |
| 18 | FAO         | International | Cooperation        | LRA, CD, MVM, LAM | Agroforestry                       | Land restoration, Parkland, Tree management , Agro-sylvo-pastoralism |                      | Trees                | Kabare, Walungu            | UN                     |     | Lebeau.NgoyMbayaWaNyenga@fao.org  |
| 19 | FACAGRO/UEA | Local         | Research institute | SBE               | Bio-gas production (from cow dung) | Improved traditional stoves, biogas, NTP                             | Research             |                      |                            | PMU                    |     |                                   |
| 20 | OIFP/UEA    | Local         | Research institute | LRA               | Agroforestry                       | Parkland, land restoration                                           | Landscape management |                      | South-Kivu                 | FAO                    | Yes | kkatcho@yahoo.com                 |
| 21 | PICAGEL     | Regional      | Cooperation        | CR,LAM, MVM       | Agronomy                           | Intercropping, manure, improved varieties, Forage production         |                      | Cassava              | South-Kivu, Tangayika      | World Bank             | Yes |                                   |
| 22 | RIKOLTO     | International | Cooperation        | PHM, MVM          | Agronomy                           |                                                                      |                      | Rice                 | Ruzizi valley              | Belgium and World Bank | Yes |                                   |
| 23 | OXFAM       | International | Cooperation        | MVM, LRA          | Agronomy                           |                                                                      |                      |                      |                            | Belgium                |     |                                   |
| 24 | ADA         | Regional      |                    |                   | Agroforestry , Agronomy            |                                                                      |                      |                      | Uvira, Fizi                |                        |     |                                   |

|    |                       |               |                    |                              |                        |                                       |              |                                  |                          |                                            |     |                                        |
|----|-----------------------|---------------|--------------------|------------------------------|------------------------|---------------------------------------|--------------|----------------------------------|--------------------------|--------------------------------------------|-----|----------------------------------------|
| 25 | IITA                  | International | Research institute | All                          | Agronomy               | Fisheries, aquaculture, improved crop | Research     |                                  | DRC                      |                                            | yes | gushmanaguy@adradrcongo.org            |
| 26 | LCD                   | International | Cooperation        |                              |                        |                                       | Humanitarian |                                  | Kabare, Walungu, Kalehe  | Belgium                                    | Yes | omatumaini@louvaincooperation.org      |
| 27 | ADE                   | Local         | ASBL               |                              | Agronomy               |                                       | Humanitarian |                                  | Kabare                   |                                            | Yes | basiminejulesb@actiondespoir.org       |
| 28 | CAB                   | Local         | ASBL               |                              |                        |                                       |              |                                  |                          |                                            | No  | cab_asbl@yahoo.fr                      |
| 29 | FONDATEUR MUDEKER EZA | Local         | ASBL               | LRA, LAM                     | Agroforestry, Agronomy |                                       |              |                                  |                          | Any                                        | Yes |                                        |
| 30 | LAV                   | Local         | ASBL               | CD, LAM                      | Agroforestry, Agronomy |                                       |              |                                  |                          | Any                                        | No  |                                        |
| 31 | ASOP                  | Local         | ASBL               | LRA, SBE, ISFM, CR, WHM, MVM | Agroforestry, Agronomy | Intercropping, green manure, ISFM     | Humanitarian | Cassava, bean, trees, vegetables | Kabare, Walungu, Kalonge | Bruxelles environnement, Brot für die Welt | Yes | fezo@asopcongo.org, info@asopcongo.org |

**Table S4.** Most relevant documentation on CSA in DRC

| N<br>o | Authors/ac<br>tors                                 | Title                                                                                                                | Practices                                                                                                                                                                                                                                                                                                                                                                                                                                                                                                                                                                                                                                                                                                                     | Region        | Institution           | Funder                     |
|--------|----------------------------------------------------|----------------------------------------------------------------------------------------------------------------------|-------------------------------------------------------------------------------------------------------------------------------------------------------------------------------------------------------------------------------------------------------------------------------------------------------------------------------------------------------------------------------------------------------------------------------------------------------------------------------------------------------------------------------------------------------------------------------------------------------------------------------------------------------------------------------------------------------------------------------|---------------|-----------------------|----------------------------|
| 1      | Cavallito (2021)                                   | Climate smart practices can fix Congo's agricultural crisis                                                          | Crop rotation, the use of biofertilizers and biopesticides and back to fallow. Suggestions: agricultural calendar, using tolerant and improved varieties, crop rotation, and developing crops in the lowlands.                                                                                                                                                                                                                                                                                                                                                                                                                                                                                                                | Yangambi      | RE SOIL Foundation    |                            |
| 2      | Mangaza et al. (2021)                              | Building a framework towards climate-smart agriculture in the Yangambi landscape, Democratic Republic of Congo (DRC) | Crops rotation, fallow practice, fertilizers, and biopesticides                                                                                                                                                                                                                                                                                                                                                                                                                                                                                                                                                                                                                                                               | Yangambi      | UNIGOM, UNIKIS, CIFOR | CIFOR                      |
| 3      | FANRPAN and Earth System Governance Project (2017) | Climate-Smart Agriculture in the DRC                                                                                 | Sustainable and secured access to land, improving women's access to technology and information by facilitating digital platforms for women and real-time agricultural data; improving women's access to funding, credit and investments; and increasing women farmers' access to markets by supporting them to form cooperatives and strengthening their capacity to meaningfully participate in the green value chain.                                                                                                                                                                                                                                                                                                       | Lubumbashi    | FANRPAN               | NORAD and ACBF             |
| 4      | Ulimwengu and Kibonge (2017)                       | Climate-Smart Agriculture Practices Based on Precision Agriculture: The Case of Maize in Western Congo               | Variable-rate application of seeds and nutrients based on inherent soil properties to increase yield in high-producing areas, maintain yield in low-producing areas, and reduce the use of costly inputs. Likewise, precision nitrogen (N) management can balance soil nutrient content, preventing unwanted nitrate leaching that can impair surface water and groundwater quality                                                                                                                                                                                                                                                                                                                                           | Bukanga Lonzo | IFPRI                 |                            |
| 5      | Sonwa et al. (2020)                                | Preliminary reflections of the potential of climate smart agriculture (CSA) in the Tshopo Province (DRC)             | Strengthen value chain, reliable and sustainable seed system, the reorganization of the extension service; strengthening of the involvement of the private sector in the supply of agricultural inputs ; integrated soil fertility management and by introducing perennial crops such as coffee; avoid/reduce seasonal fluctuation in the price of products by staggering the planting and harvesting of cassava, and by irrigating cereals and legumes; enhancement of post-harvest capacities by constructing of pilot storage, processing and sales units. Use of fallow improvement plants, cultivation under plant cover, the use of biochar, composting, agroforestry and the use of natural fertilizers or pesticides. | DRC           | CIFOR, UNIGOM, UNIKIN | NORAD and EU               |
| 6      | Assani (2019)                                      | Analysis of farmers' soil conservation practices in Cirhanyobwa Catment, South-Kivu Province, DR Congo               | Trenches, fallow, contour ploughing, minimum tillage, agroforestry, hedges, mulching, terraces                                                                                                                                                                                                                                                                                                                                                                                                                                                                                                                                                                                                                                | South-Kivu    | Kenyatta University   | IITA (CORAF-WECD) and DAAD |
| 7      | Lambrecht et al. (2014)                            | Integrated soil fertility management: From concept to                                                                | Improved varieties, row planting, mineral fertilizer, organic inputs                                                                                                                                                                                                                                                                                                                                                                                                                                                                                                                                                                                                                                                          | South-Kivu    | KU Leuven             | FWO Vlaanderen             |



|    |                          |                                                                                                                                                                            |                                                                                                                                                                                                                                                                                                                         |                        |                       |           |
|----|--------------------------|----------------------------------------------------------------------------------------------------------------------------------------------------------------------------|-------------------------------------------------------------------------------------------------------------------------------------------------------------------------------------------------------------------------------------------------------------------------------------------------------------------------|------------------------|-----------------------|-----------|
|    |                          | practice in eastern DR Congo                                                                                                                                               |                                                                                                                                                                                                                                                                                                                         |                        |                       |           |
| 8  | Malembaka (2020)         | Characterization and screening of native arbuscular mycorrhizal fungi isolates from maize ( <i>Zea mays</i> L.) agroecosystems in South-Kivu, Democratic Republic of Congo | Characterization and diversity of mycorrhizal fungi with potential for biofertilizer development                                                                                                                                                                                                                        | South-Kivu             | University of Nairobi | VLIR UOS  |
| 9  | Balangeliza (2014)       | Uptake of technology and competitiveness of legume production in small scale farming in South Kivu, Democratic Republic of Congo                                           | Biofertilizer, spacing, rhizobium, fertilizer                                                                                                                                                                                                                                                                           | South-Kivu             | Kenyatta University   | N2 Africa |
| 10 | Thiombiano et al. (2012) | Structure conceptuelle de l'Agriculture Intelligente face aux défis climatiques pour une productivité accrue dans le Bassin du Congo                                       | Sustainable soil and water management, Crop-tree-livestock integration, value addition                                                                                                                                                                                                                                  | Congo Basin            | FAO                   | FAO       |
| 11 | Chinedum et al. (2015)   | State of Knowledge on CSA in Africa: Case Studies from Nigeria, Cameroon and Democratic Republic of Congo                                                                  | Soil and water conservation structures (small scale irrigation, terraces, contour bunds, etc.); Sustainable Land Management; Tree Planting and Protection, and Agroforestry; Early-Maturing Varieties; Mulching; Fertilizer and Manure Application; Livelihood Diversification and New Crops; Changing of Planting Date | Nigeria, Cameroun, DRC | FARA, NORAD, NEPAD    | NORAD     |

**Table S5.** Courses referring to CSA practices at undergraduate level at the Faculty of Agriculture of UEA

| No | Department         | Level | Units                                                       | Hours | CSA contents                                                                                                                                                                                                                                                                               | CSA practices                                                                                                          |
|----|--------------------|-------|-------------------------------------------------------------|-------|--------------------------------------------------------------------------------------------------------------------------------------------------------------------------------------------------------------------------------------------------------------------------------------------|------------------------------------------------------------------------------------------------------------------------|
| 1  | Agronomie generale | G1    | CLIMATOLOGIE ET METEOROLOGIE                                | 45    | Weather forecasting                                                                                                                                                                                                                                                                        |                                                                                                                        |
| 2  | Environment        | G1    | CLIMATOLOGIE ET METEOROLOGIE                                | 45    | Weather forecasting                                                                                                                                                                                                                                                                        |                                                                                                                        |
| 3  | Environment        | G1    | AGROMETEOROLOGIE                                            | 15    | Weather forecasting                                                                                                                                                                                                                                                                        |                                                                                                                        |
| 4  | Environment        | G1    | INTRODUCTION A L'ENVIRONNEMENT ET AUX RESSOURCES NATURELLES | 30    | Natural resources management and GHGs minimization                                                                                                                                                                                                                                         |                                                                                                                        |
| 5  | Agronomie generale | G1    | GÉOLOGIE, MINÉRALOGIE ET GÉOMORPHOLOGIE                     | 45    | Natural resources dynamics, anthropic environmental changes, and natural disaster prevention                                                                                                                                                                                               | Elaboration of geomorphological maps                                                                                   |
| 6  | Agronomie generale | G1    | ECOLOGIE GENERALE                                           | 45    | Natural resources management, organisms interactions, coexistence theories, competition and evolution                                                                                                                                                                                      |                                                                                                                        |
| 7  | Agronomie generale | G1    | HYGIENE ET ASSAINISSEMENT                                   | 30    | Management of solid and liquid waste, development of drinking water, vector control                                                                                                                                                                                                        | Waste mapping                                                                                                          |
| 8  | Agronomie generale | G2    | MORPHOLOGIE ET SYSTEMATIQUE DES PLANTES                     | 45    | Elaborate a database of agroforestry, ornmental and weed species                                                                                                                                                                                                                           |                                                                                                                        |
| 9  | Agronomie generale | G2    | TOPOGRAPHIE ET CARTOGRAPHIE                                 | 75    | Introduction spatio-mapping and GIS                                                                                                                                                                                                                                                        | Construction of surveys (levée) and development of maps using ArcGIS software                                          |
| 10 | Agronomie generale | G2    | MOTEURS ET MACHINES AGRICOLES                               | 75    | Different sources of energy on a farm, understanding the economy of mechanized agriculture, motorized operation of ploughing, sowing and weed control, spreading fertilizer and harvesting                                                                                                 |                                                                                                                        |
| 11 | Agronomie generale | G2    | PÉDOLOGIE GÉNÉRALE ET TROPICALE                             | 90    | Soil diversity and its implications for soil management, soil classification and mapping (LULC), relationship between pedogenesis and physical and meteorological factors                                                                                                                  | Examination of soil profiles, sampling and laboratory analysis                                                         |
| 12 | Agronomie generale | G2    | LIMNOLOGIE, ICTHYOLOGIE ET PISCICULTURE                     | 60    | Biological processes involved in aquatic ecosystems, rules for the construction, development and management of ponds and artificial basins in open or closed circuits, mapping of appropriate areas by species, agriculture-livestock-aquaculture integration                              | Crop-livestock-aquaculture integration                                                                                 |
| 13 | Agronomie generale | G2    | PHYSIOLOGIE VÉGÉTALE                                        | 45    | Growth process, development and adaptability of the plant to the environment                                                                                                                                                                                                               | Microdosing                                                                                                            |
| 14 | Agronomie generale | G2    | PHYTOTECHNIE GENERALE ET SYSTEMATIQUE DE PLANTES CULTIVEES  | 60    | Understanding the interaction of climate and weather with agricultural production systems, agroecological bases of agricultural production, pest and pest management techniques, integrated soil fertility management, resilient agriculture and permaculture in the highlands of the Kivu | Determination of sowing density; plant water needs, fertilizer dose calculation, crop evaluation; composting, vertical |

|    |                       |     |                                                    |    |                                                                                                                                                                                                                                                                         |                                                                                                                                                                                                                                                         |
|----|-----------------------|-----|----------------------------------------------------|----|-------------------------------------------------------------------------------------------------------------------------------------------------------------------------------------------------------------------------------------------------------------------------|---------------------------------------------------------------------------------------------------------------------------------------------------------------------------------------------------------------------------------------------------------|
|    |                       |     |                                                    |    |                                                                                                                                                                                                                                                                         | farming practices,<br>permagarden, nursery<br>development                                                                                                                                                                                               |
| 15 | Agronomie<br>generale | G3  | MECANIQUES DES FLUIDES ET<br>HYDRAULIQUES          | 45 | Principles of water flow under atmospheric pressure (canals, rivers, dams, etc.), analysis, design and/or operation of systems designed in different environments such as installations, networks of irrigation, dams, wells, etc. ; hydraulic and hydrostatic systems. |                                                                                                                                                                                                                                                         |
| 16 | Agronomie<br>generale | G3  | AMELIORATION ET<br>CONSERVATION DES SOLS           | 45 | Erosion management; GIS-based erosion risk assessment at plot or watershed scale; principles of soil conservation and improvement and resilient agriculture; LULC                                                                                                       |                                                                                                                                                                                                                                                         |
| 17 | Agronomie<br>generale | G3  | SYLVICULTURE ET<br>AGROFORESTERIE                  | 45 | Development and management of an afforestation and an agroforestry site                                                                                                                                                                                                 | Evaluation of silvicultural<br>productivity, development<br>of silvicultural nurseries,                                                                                                                                                                 |
| 18 | Agronomie<br>generale | G3  | PHYTOTECHNIE SPÉCIALE                              | 90 | Typical systematization of the environmental aspects of the major plant classes in the tropics: climatology, pedology, phytogeography and consequences on production.                                                                                                   |                                                                                                                                                                                                                                                         |
| 19 | Agronomie<br>generale | G3  | AGROSTOLOGIE I ET CULTURES<br>FOURRAGERES          | 45 | Ecology, conservation, restoration of forage species; sustainable management of meadows and pastures                                                                                                                                                                    | Inventory of silvopastoral<br>species                                                                                                                                                                                                                   |
| 20 | Agronomie<br>generale | G3  | PHYTOPATHOLOGIE GÉNÉRALE                           | 45 | Plant-pathogen-environment interaction; biological control and integrated management of diseases and pests                                                                                                                                                              |                                                                                                                                                                                                                                                         |
| 21 | Agronomie<br>generale | G3  | ZOOLOGIE AGRICOLE GÉNÉRALE                         | 45 | Appropriate control methods for pests and exploitation of the positive effects of beneficial insects                                                                                                                                                                    |                                                                                                                                                                                                                                                         |
| 22 | Agronomie<br>generale | G3  | USINAGE DES PRODUITS<br>AGRICOLAS                  | 45 | Post-harvest preservation and value addition of agricultural products                                                                                                                                                                                                   |                                                                                                                                                                                                                                                         |
| 23 | Agronomie<br>generale | G3  | ZOOTECHNIE GÉNÉRALE                                | 45 | Livestock-human-environment interaction, agropastoralism                                                                                                                                                                                                                |                                                                                                                                                                                                                                                         |
| 24 | Agronomie<br>generale | G3  | ZOOTECHNIE SPECIALE                                | 90 | Management of the animal production environment                                                                                                                                                                                                                         |                                                                                                                                                                                                                                                         |
| 25 | Phytotechnie          | Ir1 | NUTRITION DES PLANTES ET<br>FERTILISATION DES SOLS | 75 | ISFM, prevention of fertilizer losses and pollution                                                                                                                                                                                                                     | Calculation and<br>formulation of fertilizers<br>and lime; fertilizer<br>management, application<br>methods, rate and<br>schedule, diagnosis of<br>nutrient deficiencies in the<br>field (soil and plants) and<br>their analyzes in the<br>laboratories |
| 26 | Phytotechnie          | Ir1 | MALHERBOLOGIE                                      | 30 | Integrated weed management methods; fundamental and applied knowledge for the safe and rational use of herbicides                                                                                                                                                       |                                                                                                                                                                                                                                                         |

|    |              |     |                                                     |    |                                                                                                                                                                                                                                                                                                               |                                                                                                                                                                                                                                      |
|----|--------------|-----|-----------------------------------------------------|----|---------------------------------------------------------------------------------------------------------------------------------------------------------------------------------------------------------------------------------------------------------------------------------------------------------------|--------------------------------------------------------------------------------------------------------------------------------------------------------------------------------------------------------------------------------------|
| 27 | Phytotechnie | Ir1 | PHYTIATRIE                                          | 30 | Overview of the principles of reasoned plant protection and crop protection strategies: quarantine measures, cultural practices, varietal resistance, chemical control (with the problems of resistance, residues, the effect on the environment), biological control , integrated protection and production. | Diagnosis of diseases, suggestion of integrated control measures                                                                                                                                                                     |
| 28 | Phytotechnie | Ir1 | PHYTOPHARMACIE                                      | 30 | Fate of pesticides in the environment and ecotoxicology; Legislation and regulations governing the approval and use of phytosanitary products; Good phytosanitary practices and integrated crop protection systems                                                                                            | Integrate and optimize the use of phytosanitary products in integrated crop protection; objective analysis of the main risk factors linked to the use of pesticides in agriculture, as well as that of their potential side effects. |
| 29 | Phytotechnie | Ir1 | SYSTEME D'INFORMATION GEOGRAPHIQUE ET TELEDETECTION | 75 | Model spatial data to derive essential information; Analyze spectral and RADAR images                                                                                                                                                                                                                         | Analysis and modeling of spatial data, basic remote sensing, thematic classification of multispectral and Radar (Topographic) data.                                                                                                  |
| 30 | Phytotechnie | Ir1 | ENTOMOLOGIE SPÉCIALE                                | 30 | Identification of pests, assessment of damage and development of means of effective control against the pest of crops and stocks                                                                                                                                                                              | Integrated control management                                                                                                                                                                                                        |
| 31 | Phytotechnie | Ir1 | PHYTOPATHOLOGIE SPÉCIALE                            | 30 | Diagnosis of crop diseases and means of effective management                                                                                                                                                                                                                                                  | Integrated control management                                                                                                                                                                                                        |
| 32 | Phytotechnie | Ir1 | BIOLOGIE DES SOLS                                   | 60 | Soil microbial diversity; interaction between microorganisms and between soil and microorganisms; symbiotic and non-symbiotic relationships between plants and microorganisms; biogeochemical cycles and effect of pesticides on soil microorganisms                                                          |                                                                                                                                                                                                                                      |
| 33 | Phytotechnie | Ir2 | LEGISLATION AGRICOLE ET ENVIRONNEMENTALE            | 30 | Land, agricultural and environmental law; legal standards for intensive agricultural and forestry production; preservation of the environment                                                                                                                                                                 |                                                                                                                                                                                                                                      |
| 34 | Phytotechnie | Ir2 | QUESTION SPECIALE DE FERTILITE DES SOLS             | 30 | Improved soil fertility without affecting the environment; ISFM; environmental effects of soil management, biofertilizers                                                                                                                                                                                     |                                                                                                                                                                                                                                      |
| 35 | Phytotechnie | Ir2 | HYDROLOGIE ET GESTION DES HYDRIQUES EN AGRICULTURE  | 60 | Use and development of water resources, irrigation and drainage                                                                                                                                                                                                                                               | Drop by drop, assess the need for irrigation water and design irrigation networks                                                                                                                                                    |
| 36 | Phytotechnie | Ir2 | MECANISATION AGRICOLE                               | 45 | Determination of the energy requirements of various agricultural tools; analysis of field machine operation for optimum performance; environmental aspects of machine operation                                                                                                                               |                                                                                                                                                                                                                                      |
| 37 | Phytotechnie | Ir2 | QUESTIONS SPECIALES CHANGEMENT CLIMATIQUES          | 30 | Weather and climate forecasts; mitigation measures, mitigations and adaptation to climate change; methods and tools for assessing climate                                                                                                                                                                     |                                                                                                                                                                                                                                      |

|    |              |     |                                              |    |                                                                                                                                                                                                                                                        |                                                                                                                                      |
|----|--------------|-----|----------------------------------------------|----|--------------------------------------------------------------------------------------------------------------------------------------------------------------------------------------------------------------------------------------------------------|--------------------------------------------------------------------------------------------------------------------------------------|
|    |              |     |                                              |    | impacts on ecosystems, species and people's livelihoods; policy options to reduce greenhouse gas emissions.                                                                                                                                            |                                                                                                                                      |
| 38 | Phytotechnie | Ir2 | HORTICULTURE                                 | 60 | Analysis of crop needs based on its ecological, physiological and market requirements; sustainable production in horticulture; permaculture (Permagarden), Vertical Agriculture, etc.                                                                  | Dr. Serge Ndjadi                                                                                                                     |
| 39 | Phytotechnie | Ir2 | QUESTION SPECIALE DE PROTECTION DES CULTURES | 30 | Genetic manipulations of plants to form transgenic species; biological control; selection of resistant varieties; application of phytosanitary products and environment; plant protection reasoning systems; evolution of plant protection legislation |                                                                                                                                      |
| 40 | Phytotechnie | Ir2 | PROBLÉMATIQUE DE L'ENVIRONNEMENT             | 45 | Environmental diagnosis in order to prevent environmental risks and to make an adequate development; environmental protection measures; development of a development plan for specific environments                                                    | Mapping of environmental problems in the city, elaboration of a development plan for sites with high environmental risks in the city |
| 41 | Phytotechnie | Ir2 | TRANSFORMATION DES PRODUITS AGRICOLES        | 75 | Food added value, food spoilage factors, conservation of agricultural products                                                                                                                                                                         |                                                                                                                                      |
| 42 | Phytotechnie | Ir2 | AMELIORATION SPECIALE DES PLANTES CULTIVEES  | 45 | Plant and varietal diversity; varietal development; quality seed and the seed system; improvement for yield, resistance/tolerance to stress, nutritional quality.                                                                                      |                                                                                                                                      |

**Table S6.** Training gaps on CSA and CIS in DRC

| Training theme                                                                                                                                         | Description                                                                                                                                                                                                                                                                                                  | Priority level |
|--------------------------------------------------------------------------------------------------------------------------------------------------------|--------------------------------------------------------------------------------------------------------------------------------------------------------------------------------------------------------------------------------------------------------------------------------------------------------------|----------------|
| Climate information service and real-time agricultural data                                                                                            | Given the increasing number of disasters and weather extremes in DRC, the climate information service needs improvement and different stakeholders need more awareness on how it works and how it can be effectively implemented in DRC.                                                                     | High           |
| Agriculture-livestock aquaculture integration                                                                                                          | Previous initiatives have not inserted aquaculture in the crop-livestock integration projects. With an increasing expansion of aquaculture in DRC, training is necessary to support effective integration of aquaculture to already adopted integrated farming systems                                       | High           |
| Capacity building on the elaboration of effective CSA and CIS-specific policies                                                                        | Policies are lacking mainly due to the inability of stakeholders on how to elaborate one. Adding this knowledge to the university curricula will help get effective CSA policy frameworks in the near future.                                                                                                | Medium         |
| Principles of agro-ecology farming system                                                                                                              | Agroecology teaching is lacking in DRC curricula and thus the knowledge of staff and students is superficial. There is a need to strength this aspect in training of future lecturers and students.                                                                                                          | Medium         |
| Assessment of carbon sequestration and greenhouse gas emission (carbon footprint) potential by different agro-ecologies, farming systems and land-uses | The knowledge on how the carbon footprint can be estimated needs to be added to the university curricula and more practical work included. This will be useful for adequate decision-making.                                                                                                                 | High           |
| Effective seed delivery systems of resilient crop varieties                                                                                            | The crop productivity in a climate-stress scenario is dependent on the resilience of varieties used. However, these varieties are lacking in DRC and the training on how to develop a functional seed delivery system for such resilient varieties is crucial.                                               | High           |
| CSA and CIS-oriented extension strategies                                                                                                              | Staff and students need to be equipped on the most appropriate extension strategies to increase chance of CSA and CIS practices' uptake by farmers                                                                                                                                                           | High           |
| Digital-based platforms for plant and animal disease monitoring and control                                                                            | With the increasing volume of data being generated across the country and the opportunities provided by the communication technologies, it is important to equip staff and students on how digital platforms could help for timely monitoring and information sharing on emerging animal and plant diseases. | Medium         |
| Gender issues and CSA in DRC                                                                                                                           | Staff and students need more awareness on how women can be sustainably supported through a community-centered approach to adopting and adapting livelihood strategies in innovative ways, based on current and future climate change scenarios.                                                              | Medium         |
| Information and Communications Technology (ICT) and CSA practices dissemination                                                                        | These technologies have been instrumental in disseminating CSA practices and climate information in other African countries. Yet, these are still unknown in DRC and lack in the university curricula.                                                                                                       | Medium         |
| Agricultural and agroforestry land suitability analyses using GIS and remote sensing tools                                                             | Due to high cost of field assessment, the use of GIS and remote sensing tools in data-scarce context such as DRC could help rapidly identify and quantify suitable lands for agricultural activities at low cost. Yet, very few human resources exist in DRC.                                                | Medium         |
| Biofertilizer and biopesticide development                                                                                                             | DRC is among countries with lowest external farm inputs worldwide because of poverty among farmers and cultural (belief system) resistance. Equipping staff                                                                                                                                                  | Medium         |

|                                                                                                   |                                                                                                                                                                                                                                                                                                                     |        |
|---------------------------------------------------------------------------------------------------|---------------------------------------------------------------------------------------------------------------------------------------------------------------------------------------------------------------------------------------------------------------------------------------------------------------------|--------|
|                                                                                                   | and students on alternative approaches could help boost adoption and farm productivity in DRC.                                                                                                                                                                                                                      |        |
| Agricultural waste recycling options                                                              | Adequate options for waste recycling could help reduce pollution and increase farmers' food and income security in DRC. Adding economic and eco-friendly recycling options (such as mushroom production, animal feed processing, etc.) in the curricula is important.                                               | Medium |
| Cost-effective renewable energy and biogas production                                             | The use of renewable energy like the biogas is an effective mean of reducing pressure on forests and other natural resources in rural DRC. Experiments were conducted at institutional levels but awareness of their opportunity and implementation is still low among students as the curricula seldom include it. | High   |
| Permagarden farming approaches                                                                    | Crop mixing is among climate change resilience strategies. Better understanding on how the permagarden can be economically practiced in DRC is crucial since the country agriculture is mainly conducted on small plots by resource-poor smallholder farmers.                                                       | Medium |
| Microdosing and micro-irrigation systems                                                          | The application of fertilizer and water is often inefficient due to misuse of products and the dosage is not well mastered by farmers. Training students on microdosing and micro-irrigation systems would help fix the situation in the near future.                                                               | Medium |
| Crop diversification and climate-resilience potential of neglected and underutilized crop species | Neglected and underutilized crops, as the most adapted to local agricultural systems and climates, are now perceived as a mean to minimize adverse effects of climate changes. Yet, their knowledge is poor among staff and students.                                                                               | Medium |
| Conservation and enhancement of biodiversity and ecosystem services                               | Mismanagement of biodiversity is often due to lack of information on ecosystem services they provide. Increasing awareness on the topic will help student make reasonable decisions in their carrier vis-à-vis the conservation and enhancement of biodiversity and ecosystem services in DRC.                      | Medium |
