# Supplementary material
Source: MDPI journal article supplement (https://www.mdpi.com/2073-445X/11/10/1850)
Supplement: s1 [file s1]

Archive with 1 entries (1 files):
- land-1976229-supplementary.pdf
